# Supplementary material for: Elevated Extracellular HSP72 and Blunted Heat Shock Response in Severe COVID-19 Patients
Source: MDPI journal article supplement (doi:10.3390/biom12101374), 2022-09-26
Supplement: s1 [file s1]

Table S1. Patient Medication Profile

|                 | Control |     | Diabetes |      |
|-----------------|---------|-----|----------|------|
| Medications     | n       | %   | n        | %    |
| ACE inhibitors  | 1       | 3,8 | 10       | 33,3 |
| Metformin       | 0       | 0   | 15       | 51,7 |
| Sulfonylurea    | 0       | 0   | 5        | 17,2 |
| DPP4 inhibitors | 0       | 0   | 1        | 3,4  |
| Insulin NPH     | 0       | 0   | 5        | 16,7 |
| Regular Insulin | 0       | 0   | 1        | 3,3  |
| Statins         | 2       | 7,7 | 10       | 34,5 |

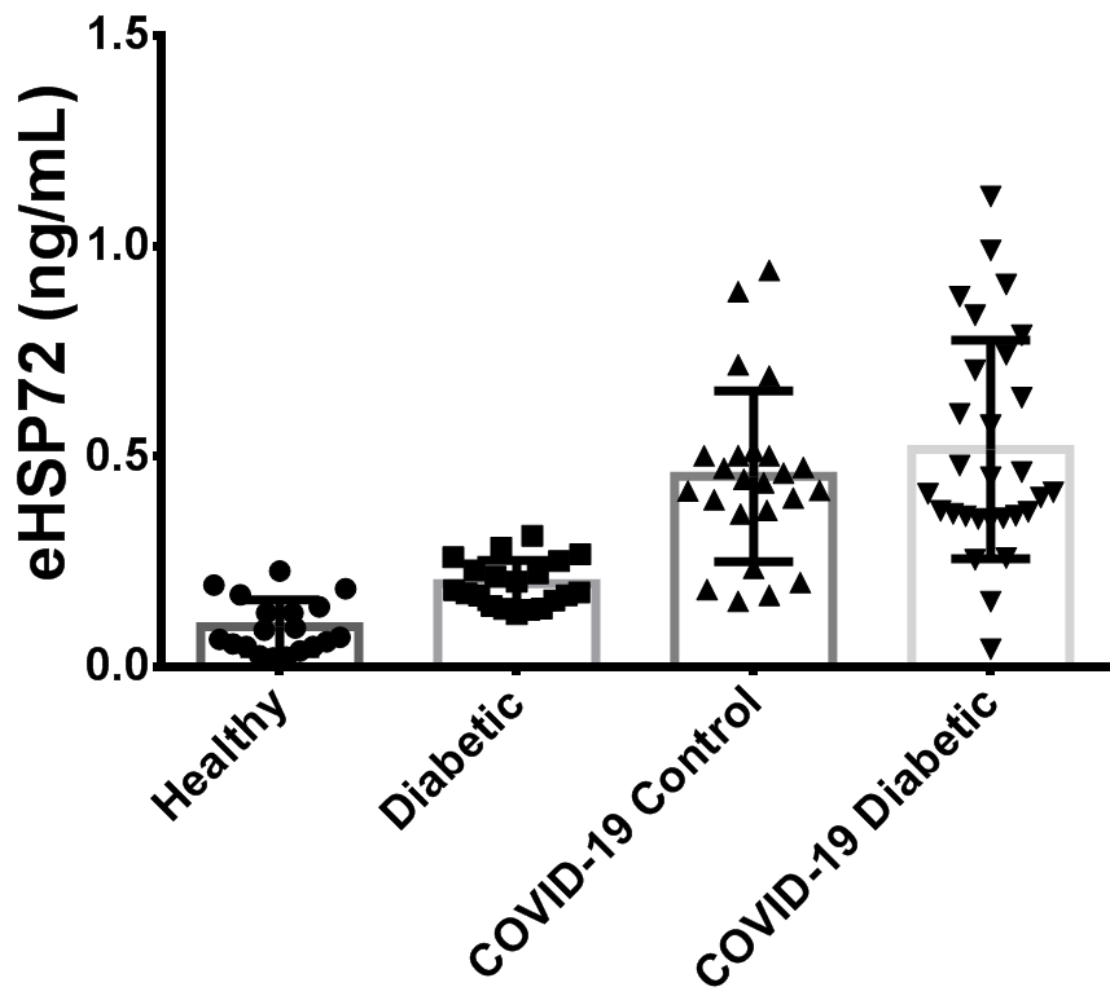

Figure S1. eHSP72 with separate groups
